# Supplementary material for: Integrating tough Antheraea pernyi silk and strong carbon fibres for impact-critical structural composites
Source: PubMed Central journal article supplement (PMC6706406; doi:10.1038/s41467-019-11520-2), 2019-08-22
Supplement: 41467_2019_11520_MOESM1_ESM.pdf [file 41467_2019_11520_MOESM1_ESM.pdf]

## **Supplementary Information**

### **Integrating tough *Antheraea pernyi* silk and strong carbon fibres for impact-critical structural composites**

Kang Yang, Juan Guan, Keiji Numata, Change Wu, Sujun Wu,  
Zhengzhong Shao, and Robert O. Ritchie

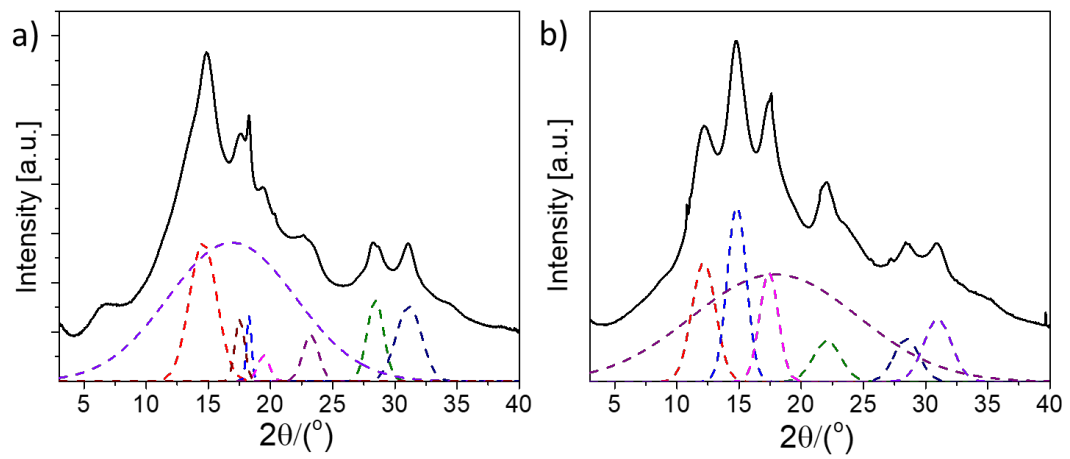

**Supplementary Figure 1** Peak-fitting analysis of the WAXS profiles using Gaussian functions. **a** *B.mori* silk, **b** *A. pernyi* silk.

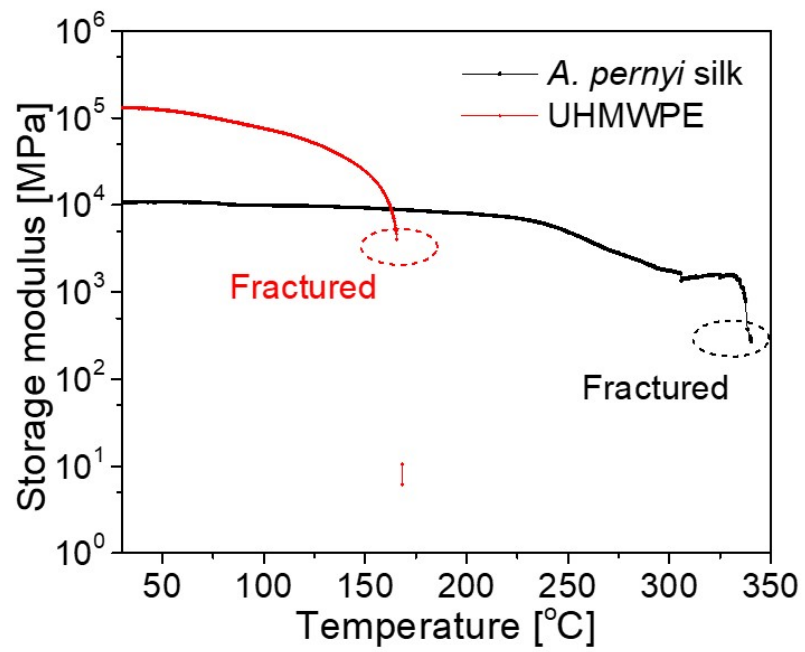

**Supplementary Figure 2** DMTA plots of storage modulus and  $\tan\delta$  for natural *A. pernyi* silk and UHMWPE.

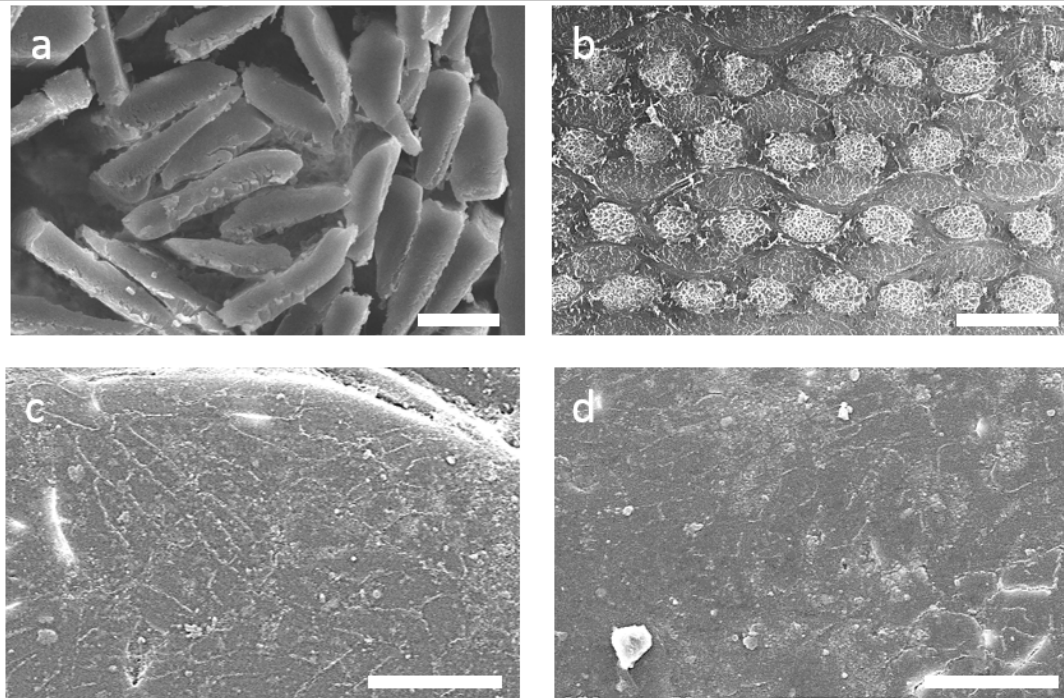

**Supplementary Figure 3** SEM images of the cross-sectional morphologies. **a.** *pernyi* silk bundle, and **b, c** and **d** SFRP at various magnifications. Scale bars: **a** 20  $\mu\text{m}$ , **b** 500  $\mu\text{m}$ , **c** and **d** 50  $\mu\text{m}$ .

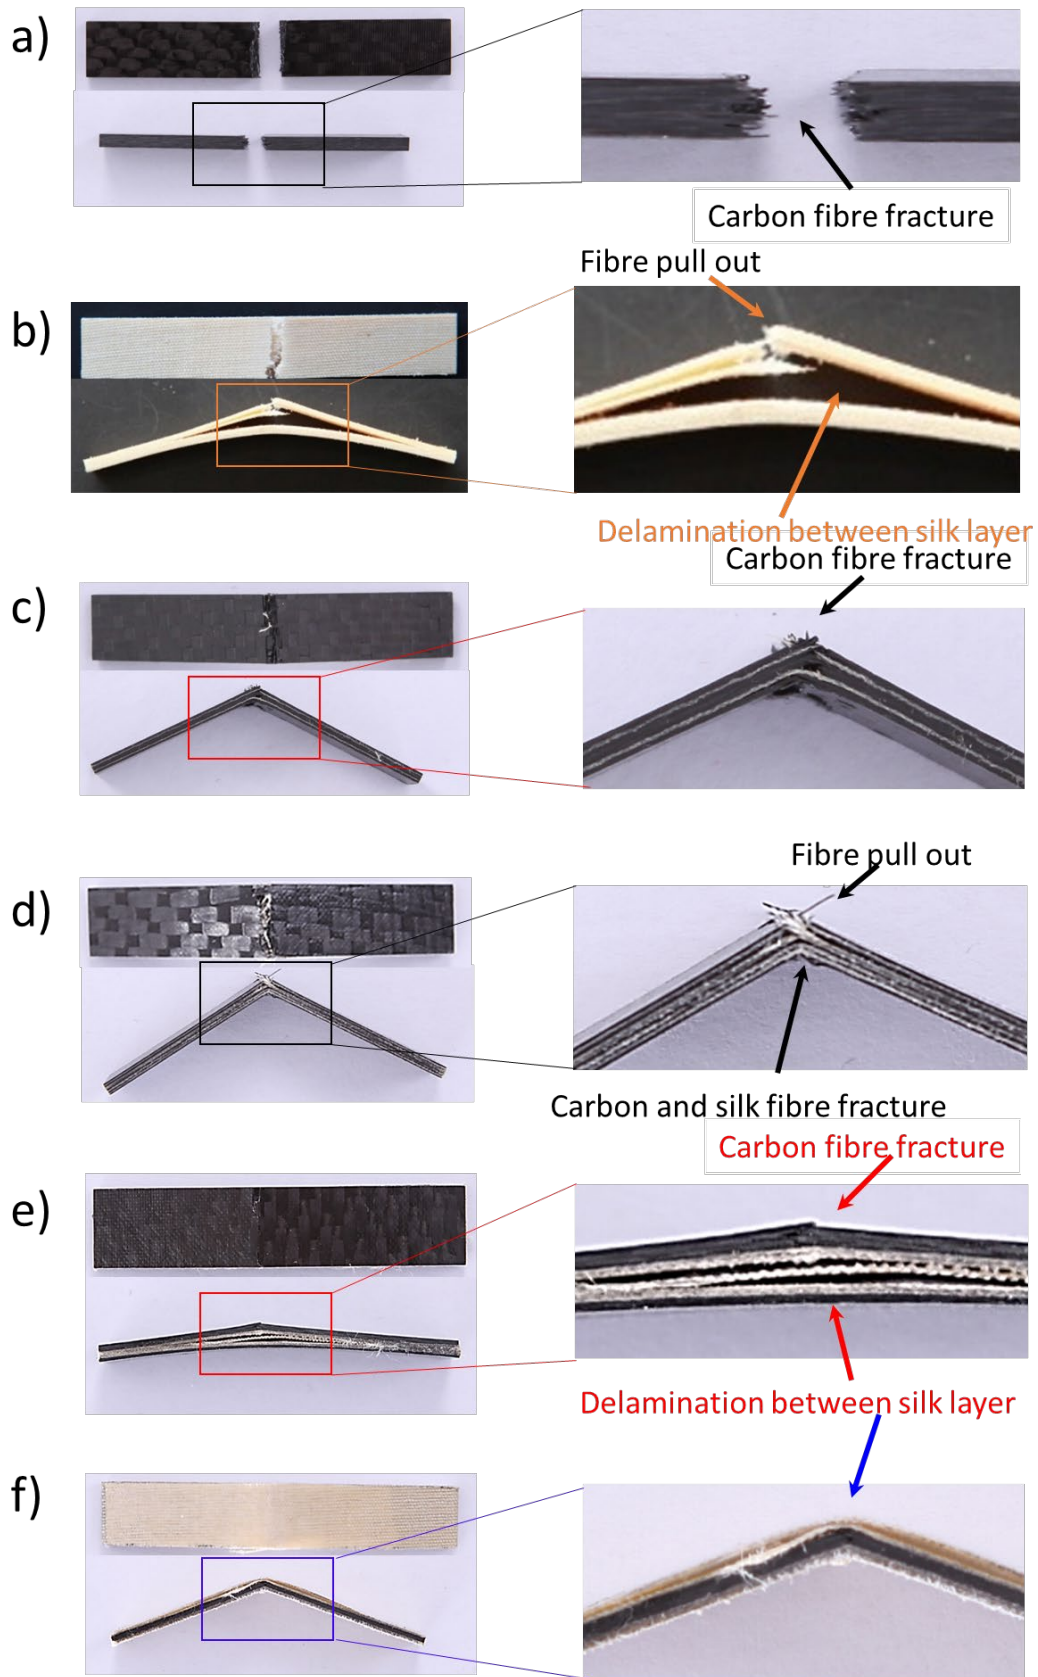

**Supplementary Figure 4** Fracture morphology of different composites after unnotched Charpy impact testing. **a** CFRP, **b** SFRP, **c** 8C2S, **d** 5C5S-1, **e** 5C5S-2, and **f** 5C5S-3.

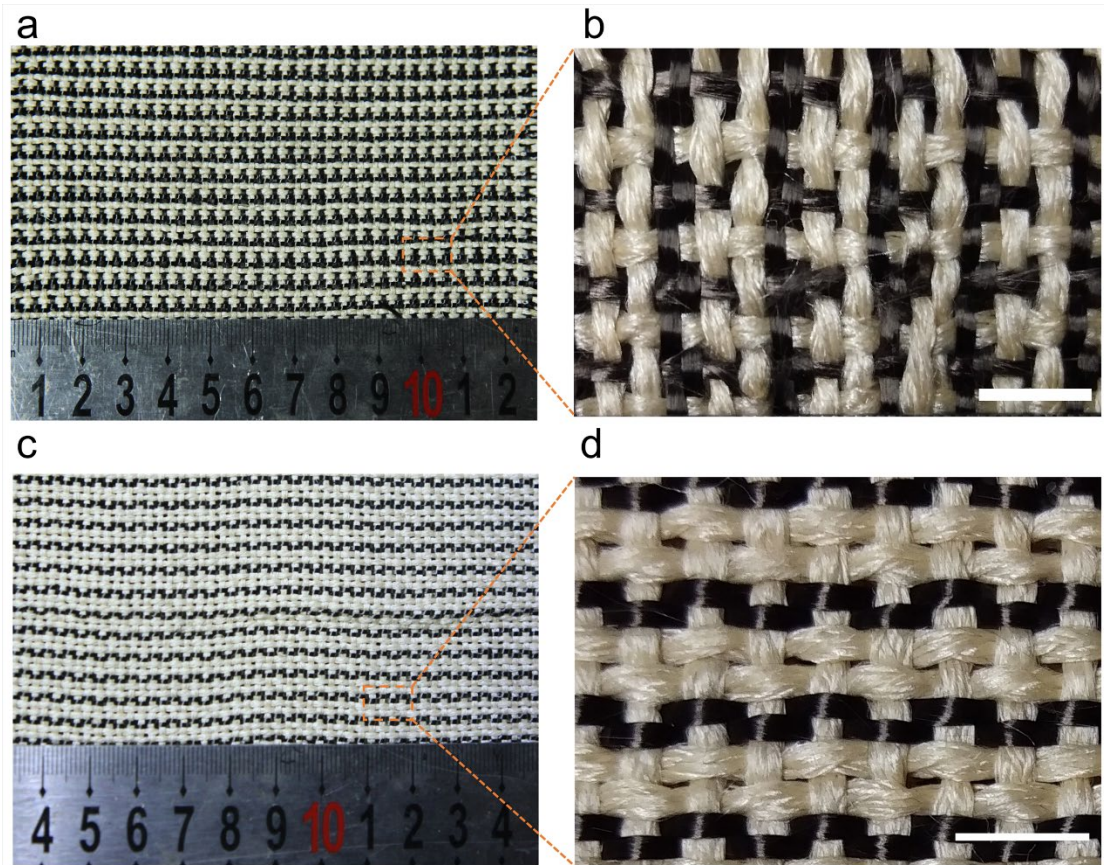

**Supplementary Figure 5** Photographs of two intra-ply/IP hybrid fabrics from *A. pernyi* silks and carbon fibres. **a** and **b** IP-1 and **c** and **d** IP-2. Note that the two fabrics were designed and woven at a textile factory. Scale bars: **b** and **d** 5 mm.

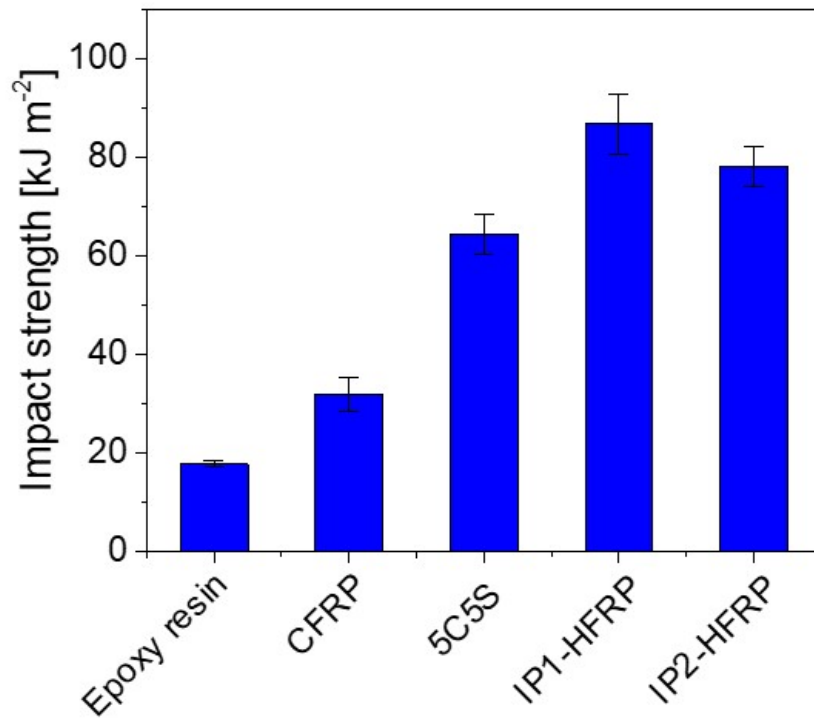

**Supplementary Figure 6** Charpy impact strength of different samples. The samples include epoxy resin matrix, CFRP, inter-ply HFRP/5C5S and HFRPs from the two intra-ply hybrid fabrics, IP1-HFRP and IP2-HFRP. Note that the epoxy resin matrix was epoxy 1564 with hardeners 3486. The error bars represented the standard deviation of measured means.

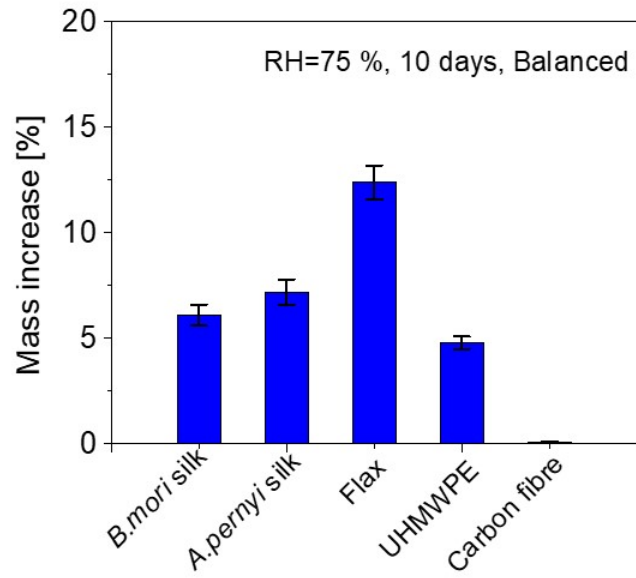

**Supplementary Figure 7** Comparison of the mass increase of five fibres after environmental conditioning. The error bars represented the standard deviation of measured means.



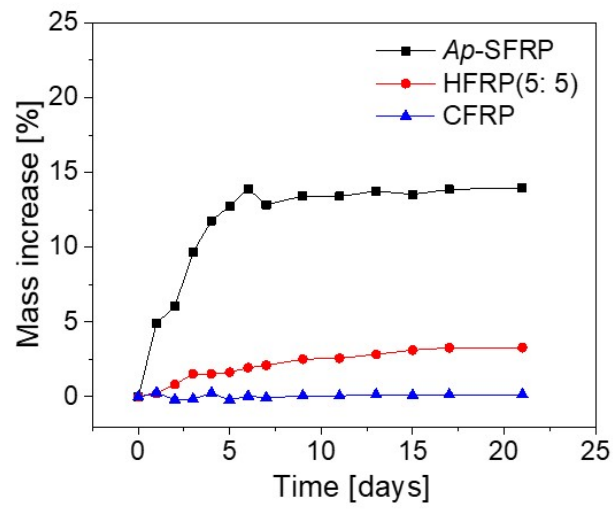

**Supplementary Figure 8** Comparison of mass increase of different composites as a function of immersion time. The immersion condition was in ultrapure water at  $23^{\circ}\text{C} \pm 2^{\circ}\text{C}$ . Note that the epoxy resin matrix was epoxy 1564 with hardeners 3486.

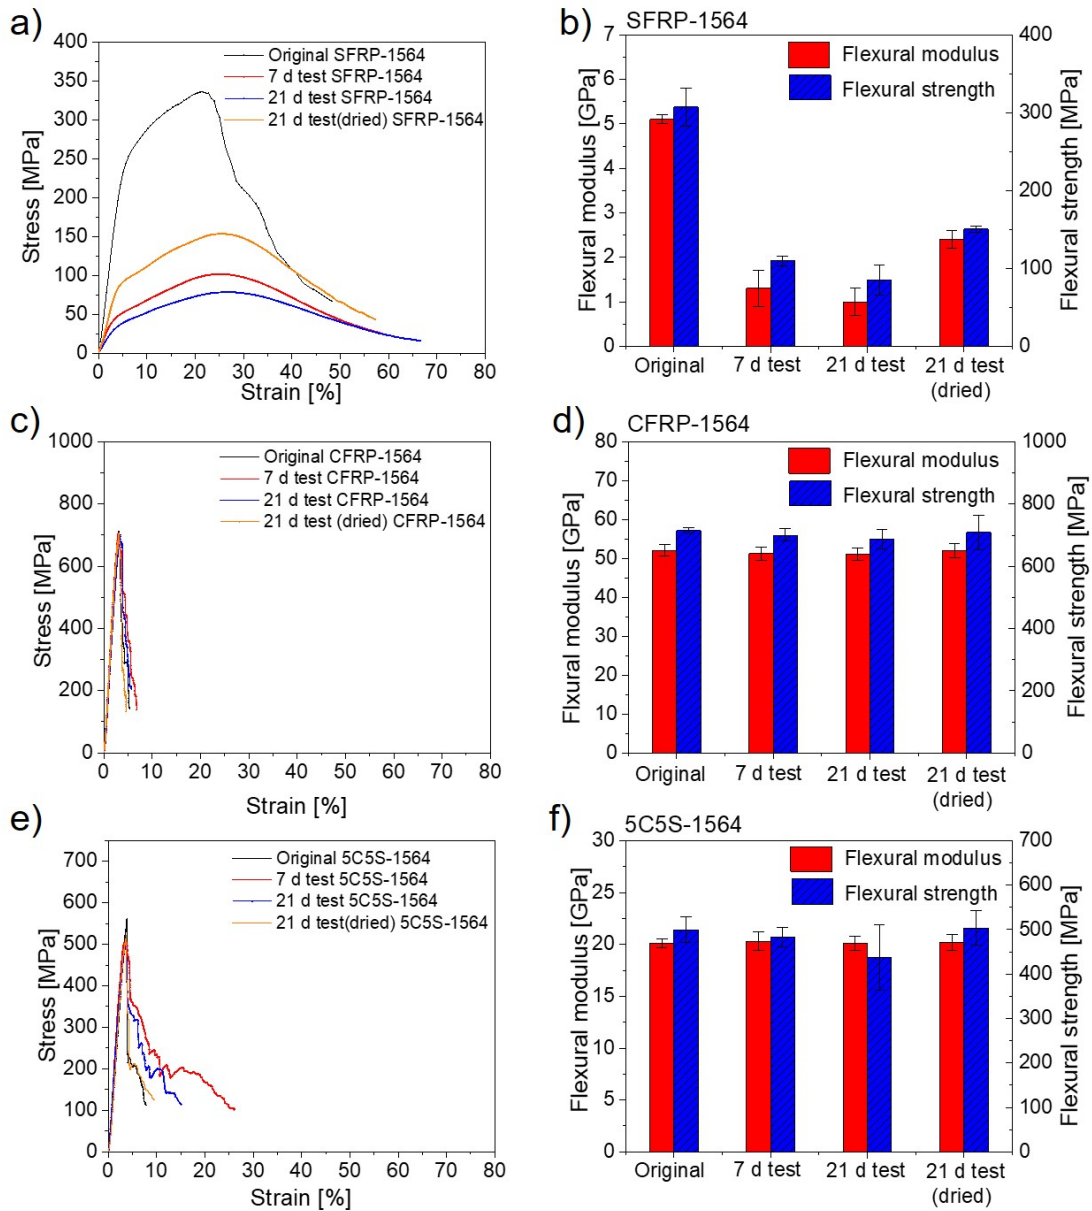

**Supplementary Figure 9** Comparison of flexural properties of three composites. **a** and **b** SFRP, **c** and **d** CFRP, **e** and **f** HFRP/5C5S, before and after the water-immersion treatment for 7 days and 21 days. Note: The epoxy resin matrix was epoxy 1564 with hardeners 3486. The error bars represented the standard deviation of measured means.

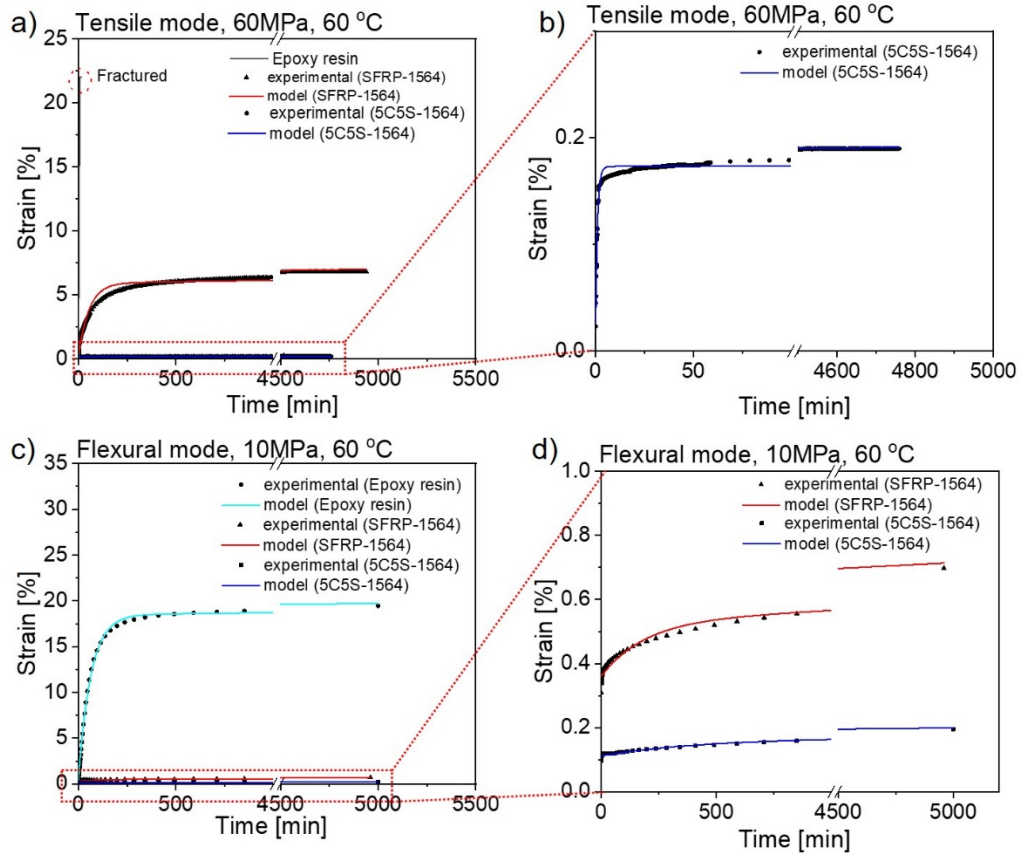

**Supplementary Figure 10** Creep behaviour of epoxy resin, *A. pernyi* SFRP and HFRP/5C5S. **a** and **b** tensile stress of 60 MPa, and **c** and **d** flexural stress of 10 MPa. Note that the epoxy resin matrix was epoxy 1564 with hardeners 3486.

**Supplementary Table 1** Mechanical properties of the resin and composites in this work.

| Specimen    | Physical properties |       | Tensile properties |            |            |                 |                 | Flexural properties |          |            |             |                 | Impact properties |                 |
|-------------|---------------------|-------|--------------------|------------|------------|-----------------|-----------------|---------------------|----------|------------|-------------|-----------------|-------------------|-----------------|
|             | $\rho$              | $V_f$ | $E_t$              | $E_t/\rho$ | $\sigma_t$ | $\sigma_t/\rho$ | $\varepsilon_t$ | $BE_t$              | $E_f$    | $E_f/\rho$ | $\sigma_f$  | $\sigma_f/\rho$ | $\sigma_i$        | $\sigma_i/\rho$ |
| Epoxy resin | 1.2                 | 0     | 3.2±0.1            | 2.7±0.1    | 76.6±1.3   | 63.8±1.1        | 2.8±0.1         | 1.1±0.1             | 3.5±0.0  | 2.9±0.0    | 134.2±6.4   | 111.8±5.3       | 12.8±0.2          | 10.7±0.1        |
| CFRP        | 1.61                | 69    | 65.2±3.2           | 40.5±2.0   | 554.8±13.7 | 344.6±8.5       | 0.91±0.0        | 2.4±0.1             | 55.1±2.1 | 34.2±1.3   | 1002.1±28.5 | 622.4±17.7      | 43.3±3.7          | 26.9±2.3        |
| 8C2S        | 1.56                | 65    | 63.5±3.8           | 40.7±2.4   | 501.4±14.2 | 321.4±9.1       | 0.86±0.1        | 2.4±0.2             | 43.2±2.5 | 27.7±1.6   | 571.3±17.4  | 366.2±11.2      | 73.6±5.2          | 47.2±3.3        |
| 5C5S-1      | 1.43                | 61    | 39.3±2.7           | 27.4±1.9   | 380.0±10.9 | 265.7±7.6       | 1.0±0.1         | 2.0±0.1             | 38.1±2.4 | 26.6±1.7   | 641.3±25.3  | 448.5±17.7      | 97.5±4.7          | 68.2±3.3        |
| 5C5S-2      | 1.43                | 61    | 38.5±3.0           | 26.9±2.1   | 376.5±8.9  | 263.3±6.2       | 0.99±0.1        | 2.0±0.1             | 15.2±0.8 | 10.6±0.6   | 461.2±18.9  | 322.5±13.2      | 85.5±4.8          | 59.8±3.4        |
| 5C5S-3      | 1.43                | 61    | 40.6±2.8           | 28.3±1.9   | 393.3±10.4 | 275.0±7.3       | 1.1±0.0         | 2.0±0.1             | 34.4±2.8 | 24.0±1.9   | 335.9±21.4  | 234.9±15.0      | 80.4±6.2          | 56.2±4.3        |
| 2C8S        | 1.32                | 56    | 17.2±1.7           | 13.0±1.3   | 176.0±5.4  | 133.3±4.1       | 1.2±0.1         | 1.2±0.2             | 31.8±2.6 | 24.1±2.0   | 262.6±17.3  | 198.9±13.1      | 77.3±6.0          | 58.6±4.5        |
| SFRP        | 1.25                | 51    | 7.8±0.2            | 6.2±0.2    | 129.3±3.2  | 103.4±2.6       | 9.6±0.1         | 9.9±0.3             | 6.8±0.3  | 5.4±0.2    | 256.6±13.6  | 205.3±10.9      | 90.8±5.4          | 72.6±4.3        |

$\rho$ :density ( $10^3 \text{ kg.m}^{-3}$ ),  $V_f$ : fibre volume fraction (%),  $E_t$ : tensile modulus (GPa),  $\rho$ :density,  $E_t/\rho$ : specific tensile modulus ( $\text{GPa}(10^3 \text{ kg.m}^{-3})^{-1}$ ),  $\sigma_t$ : tensile strength (MPa),  $\sigma_t/\rho$ : specific tensile strength ( $\text{MPa}(10^3 \text{ kg.m}^{-3})^{-1}$ ),  $\varepsilon_t$ : ultimate tensile strain (%),  $BE_t$ : tensile fracture energy ( $\text{MJ.m}^{-3}$ ),  $E_f$ : flexural modulus (GPa),  $E_f/\rho$ : specific flexural modulus ( $\text{GPa}(10^3 \text{ kg.m}^{-3})^{-1}$ ),  $\sigma_f$ : flexural strength (MPa),  $\sigma_f/\rho$ : specific flexural strength ( $\text{MPa}(10^3 \text{ kg.m}^{-3})^{-1}$ ),  $\sigma_i$ : impact strength ( $\text{kJ.m}^{-2}$ ),  $\sigma_i/\rho$ : specific impact strength ( $\text{kJ.m}^{-2}(10^3 \text{ kg.m}^{-3})^{-1}$ )

**Supplementary Table 2** Dataset of density and impact strength of the composites in the literature.

| <b>Sample</b>    | <b>Volume fraction</b> | <b>Density [10<sup>3</sup> kg m<sup>-3</sup>]</b> | <b>Impact strength [kJ m<sup>-2</sup>]</b> | <b>Reference</b> |
|------------------|------------------------|---------------------------------------------------|--------------------------------------------|------------------|
| Flax-PP          | 20%                    | 1.02                                              | 10                                         | 1                |
| Flax-PP          | 40%                    | 1.11                                              | 15                                         | 1                |
| Flax-epoxy       | 35%                    | 1.27                                              | 10.5 ± 1.1                                 | 2                |
| Hemp-epoxy       | 65%                    | 1.37                                              | 12                                         | 3                |
| Hemp-PLA         | 30%                    | 1.28                                              | 9                                          | 4                |
| Kenaf-PLA        | 40%                    | 1.32                                              | 14                                         | 5                |
| Hemp-PLA         | 30%                    | 1.28                                              | 19                                         | 6                |
| Kenaf-PHB        | 40%                    | 1.35                                              | 10                                         | 5                |
| Jute-Acrylic     | None                   | 1.25                                              | 8.8 ± 1.0                                  | 7                |
| Jute-polyester   | None                   | 1.27                                              | 10.6 ± 1.0                                 | 7                |
| Sisal-acrylic    | None                   | 1.20                                              | 12.7 ± 1.4                                 | 7                |
| Sisal-polyester  | None                   | 1.19                                              | 12.2 ± 1.7                                 | 7                |
| Flax-acrylic     | None                   | 1.22                                              | 15.0 ± 0.9                                 | 7                |
| Flax-polyester   | None                   | 1.21                                              | 13.2 ± 0.9                                 | 7                |
| Hemp-PLA         | 45%                    | 1.32                                              | 25                                         | 8                |
| PALF-polyester   | 30%                    | 1.27                                              | 24                                         | 9                |
| Flax-PP          | 30%                    | 1.06                                              | 22                                         | 10               |
| Flax-PP          | 30%                    | 1.06                                              | 18                                         | 11               |
| Carbon-epoxy     | 66%                    | 1.6                                               | 109.8                                      | 12               |
| Carbon-polyimide | 30%                    | 1.49                                              | 11.5                                       | 13               |
| Carbon-epoxy     | 10%                    | 1.26                                              | 19.6                                       | 14               |
| Carbon-epoxy     | None                   | None                                              | 69.4                                       | 15               |
| Carbon-epoxy     | 40%                    | 1.44                                              | 27.8                                       | 16               |
| Carbon-epoxy     | 55%                    | 1.53                                              | 114                                        | 17               |
| Glass-epoxy      | None                   | 1.69                                              | 168                                        | 18               |
| Glass-PP         | 35%                    | 1.51                                              | 100                                        | 19               |
| Glass-Acrylic    | 30%                    | 1.62                                              | 98.7                                       | 20               |
| Glass-Polyester  | 30%                    | 1.62                                              | 106.5                                      | 20               |
| Glass-epoxy      | 30%                    | 1.62                                              | 122                                        | 21               |
| Glass-acrylic    | None                   | 1.71                                              | 98.7 ± 8.0                                 | 7                |
| Glass-polyester  | None                   | 1.64                                              | 106.5 ± 4.2                                | 7                |
| Glass-polyester  | 57%                    | 2.02                                              | 69                                         | 22               |
| Glass-epoxy      | 61%                    | 2.05                                              | 137                                        | 22               |

N.B., We estimated the density in ref. 15 as  $1.5 \times 10^3 \text{ kg m}^{-3}$  from the matrix and fibre species.

## Supplementary References

1. Van den Oever, M. J. A., Bos, H. L. & Molenveld, K. Flax fibre physical structure and its effect on composite properties: Impact strength and thermo-mechanical properties, *Die Angew. Makromol. Chem.* **272**, 71-76 (1999).
2. George, J., Weyenberg, I. V. D., Ivens, J. & Verpoest, I. Mechanical properties of flax fibre reinforced epoxy composites. *Macromol. Mater. Eng.* **272**, 41-45(1999).
3. Islam, M. S., Pickering, K. L. & Foreman, N. J. Influence of alkali fiber treatment and fiber processing on the mechanical properties of hemp/epoxy composites. *J. Appl. Polym. Sci.* **119**, 3696-3707(2011).
4. Islam, M. S., Pickering, K. L. & Foreman, N. J. Influence of alkali treatment on the interfacial and physico-mechanical properties of industrial hemp fibre reinforced polylactic acid composites. *Compos. Part A: Appl. Sci. Manufac.* **41**, 596-603(2010).
5. Graupner, N. & Mussig, J. A comparison of the mechanical characteristics of kenaf and lyocell fibre reinforced poly(lactic acid) (PLA) and poly(3-hydroxybutyrate) (PHB) composites. *Compos. Part A: Appl. Sci. Manufac.* **42**, 2010-2019(2011).
6. Baghaei, B. et al. Novel aligned hemp fibre reinforcement for structural biocomposites: Porosity, water absorption, mechanical performances and viscoelastic behavior. *Compos. Part A: Appl. Sci. Manufac.* **61**, 1-12(2014).
7. Rodriguez, E., Petrucci, R., Puglia, D., Kenny, J.M. & Vazquez, A. Characterization of composites based on natural and glass fibers obtained by vacuum infusion. *J. Compos. Mater.* **39**, 265-282(2005).
8. Baghaei, B., Skrifvars, M. & Berglin, L. Manufacture and characterisation of thermoplastic composites made from PLA/hemp co-wrapped hybrid yarn prepregs. *Compos. Part A: Appl. Sci. Manufac.* **50**, 93–101(2013).
9. Devi, L. U., Bhagawan, S. S. & Thomas, S. Mechanical properties of pineapple leaf fiber-reinforced polyester composites. *J. Appl. Polym. Sci.* **64**, 1739-1748(1997).
10. Snijder, M. H. B. & Bos, H. L. Reinforcement of polypropylene by annual plant fibers: optimisation of the coupling agent efficiency. *Compos. Interface* **7**, 69-79(2000).
11. Hill, C. A. S., Khalil, H. P. S. & Hale, M. D. A study of the potential of acetylation to improve the properties of plant fibres. *Ind. Crop. Prod.* **8**, 53-63(1998).
12. Ouyang, G. E., Sun, Q. H. & Lin, F. S. Studying impact behavior of carbon fiber/epoxy composites, fiber reinforced plastics. *Composites*, **4**, 6-7(2003).
13. Wang, X. D., Wang, X., Zhu, P. & Huang, P. Mechanical properties and tribological performance of plastic polyimide reinforced by carbon fibers. *Mat. Sci. Eng. R.* **29**, 42-45(2005).
14. Chang, L., Zhang, Z. & Breidt, C. Impact resistance of short fibre/particle reinforced epoxy. *Appl. Compos. Mater.* **11**, 1-15(2004).

15. Dong, J. D. et al. Improved mechanical properties of carbon fiber-reinforced epoxy composites by growing carbon black on carbon fiber surface. *Compos. Sci. Technol.* **149**, 75-80 (2017).
16. Zhong, W. Z., Ye, F. T. & Yi, T. U. Mechanical properties of epoxy resin composites reinforced by short carbon fibers treated with ball milling-liquid phase oxidation method, *Acta Armamentarii* **34**, 869-875(2013).
17. Adams, D. F. & Miller, A. K. An analysis of the impact behavior of hybrid composite materials. *Mat. Sci. Eng.* **19**, 245-260(1975).
18. Sebastian, H., Tim, W., Lozoya, V. & Tomas, J. Comparison of impact behaviour of glass, carbon and Dyneema composites. *P. I. Mech. Eng. C-J. Mec.* **233**, 951-966(2019).
19. Zhao, N., Rödel, H., Herzberg, C., Gao, S. L. & Krzywinski, S. Stitched glass/PP composite. Part I: Tensile and impact properties. *Compos. Part A: Appl. Sci. Manufac.* **40**, 635-643(2009).
20. Rodriguez, E. Characterization of composites based on natural and glass fibers obtained by vacuum infusion. *J. Compos. Mater.* **39**, 265-82(2005).
21. Aldulaim, Q. Effect of water absorption on impact strength for epoxy-glass fibers composite, *J. Univ. Anbar Pure Sci.* **5**, 1-6, (2011).
22. Yeung, P. & Broutman, L. J. The effect of glass-resin interface strength on the impact strength of fiber reinforced plastics. *Polym. Eng. Sci.* **18**, 62-72(2010).
